# Supplementary material for: Binding of pixantrone to DNA at CpA dinucleotide sequences and bulge structures
Source: Royal Society of Chemistry journal article supplement (doi:10.1039/c5ob00526d), 2015-01-01
Supplement: c5ob00526d1.pdf [file c5ob00526d1.pdf]

## Supplementary Information

### Binding of pixantrone to DNA at CpA dinucleotide sequences and bulge structures

Shyam K. Konda<sup>a</sup>, Haiqiang Wang<sup>a</sup>, Suzanne M. Cutts<sup>b\*</sup>,  
Don R. Phillips<sup>b</sup> and J. Grant Collins<sup>a\*</sup>

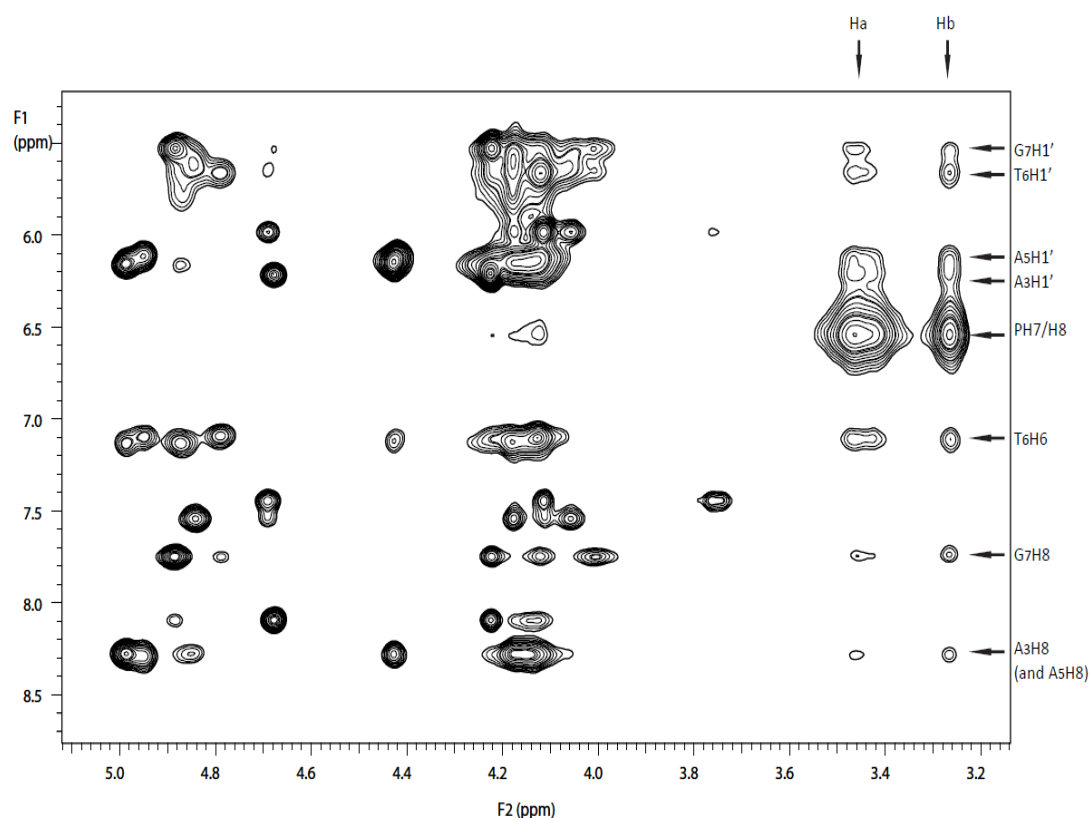

**Figure S1** An expansion of a NOESY spectrum of  $d(\text{TCATATGA})_2$  with added pixantrone, at a drug to DNA duplex ratio of 2, at 30 °C in  $\text{D}_2\text{O}$  and pH 7 phosphate buffer. The expansion shows the NOE connectivities from the pixantrone H7/H8 protons to the octanucleotide H3', H4', H5' and H5'' sugar protons (3.2 to 5.5 ppm), and the NOEs from the pixantrone Ha/Hb protons to the octanucleotide H8/H6 protons.

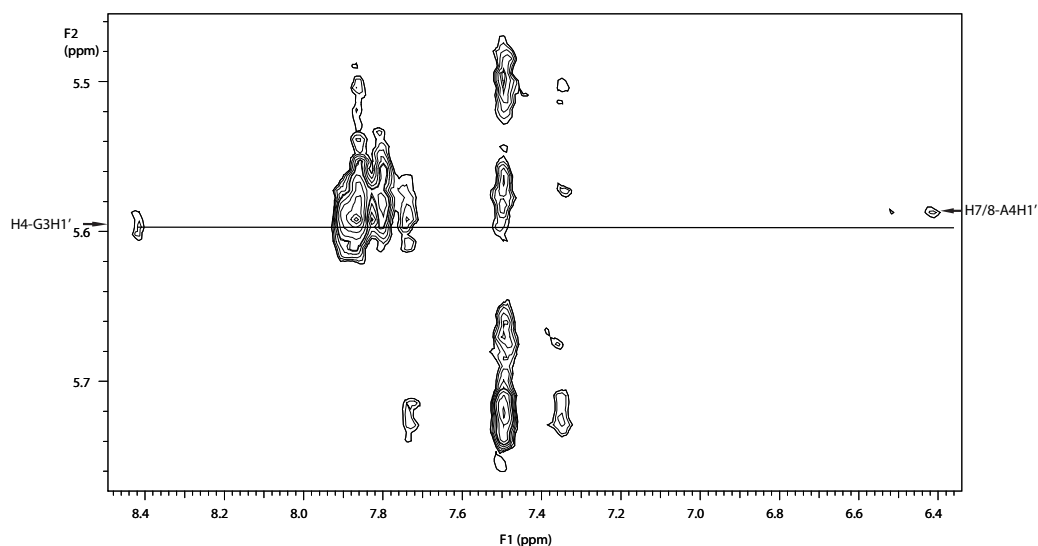

**Figure S2** An expansion of a NOESY spectrum of DB with added pixantrone, at a drug to DNA duplex ratio of 1, in pH 7 phosphate buffer at 5 °C. In this case, the FID was processed with a shifted sine bell function in both dimensions to allow the resolution of the resonances from the G<sub>3</sub>H1' and A<sub>4</sub>H1' protons of DB. The G<sub>3</sub>H1' and A<sub>4</sub>H1' resonances were assigned from their connectivities to their own and 5'- sugar H2'/H2'' resonances.

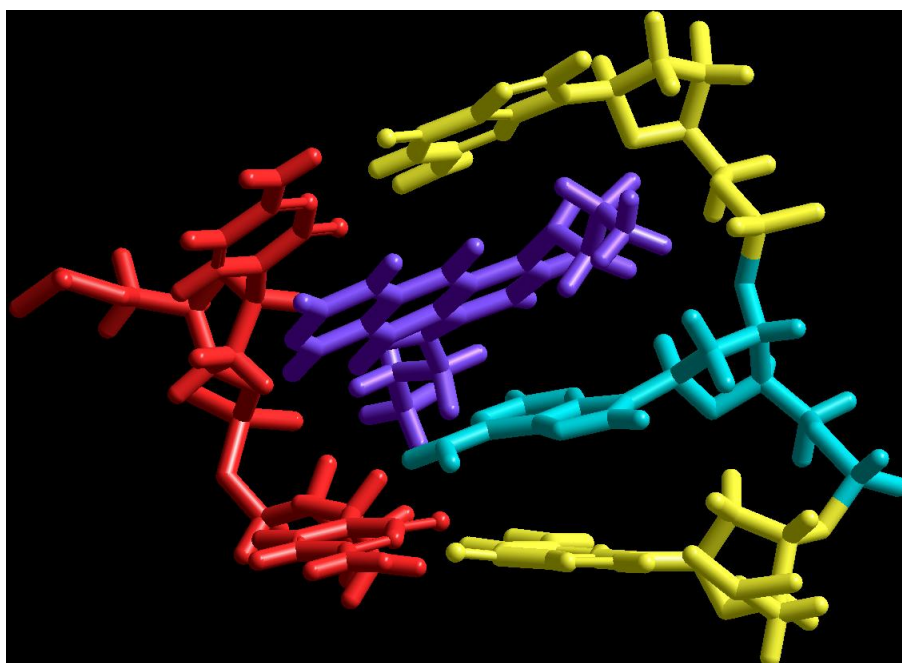

**Figure S3** Energy minimised HyperChem molecular model of pixantrone-bound SB generated using HyperChem 7.5. The pixantrone is inserted from minor groove at the A<sub>8</sub>pG<sub>9</sub> site. The bases are colour coded: adenine (cyan), guanine (yellow) and cytosine (red) and pixantrone is in violet.
